# Supplementary material for: The role of refractive indices in measuring mineral dust with high-spectral-resolution infrared satellite sounders: application to the Gobi Desert
Source: Copernicus journal article supplement (doi:10.5194/acp-24-12277-2024), 2024-11-06
Supplement: Supplementary file 1 [file acp-24-12277-2024-supplement.pdf]

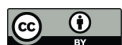

*Supplement of*

## **The role of refractive indices in measuring mineral dust with high-spectral-resolution infrared satellite sounders: application to the Gobi Desert**

**Perla Alalam et al.**

*Correspondence to:* Hervé Herbin ([herve.herbin@univ-lille.fr](mailto:herve.herbin@univ-lille.fr))

The copyright of individual parts of the supplement might differ from the article licence.

## Supplementary Material

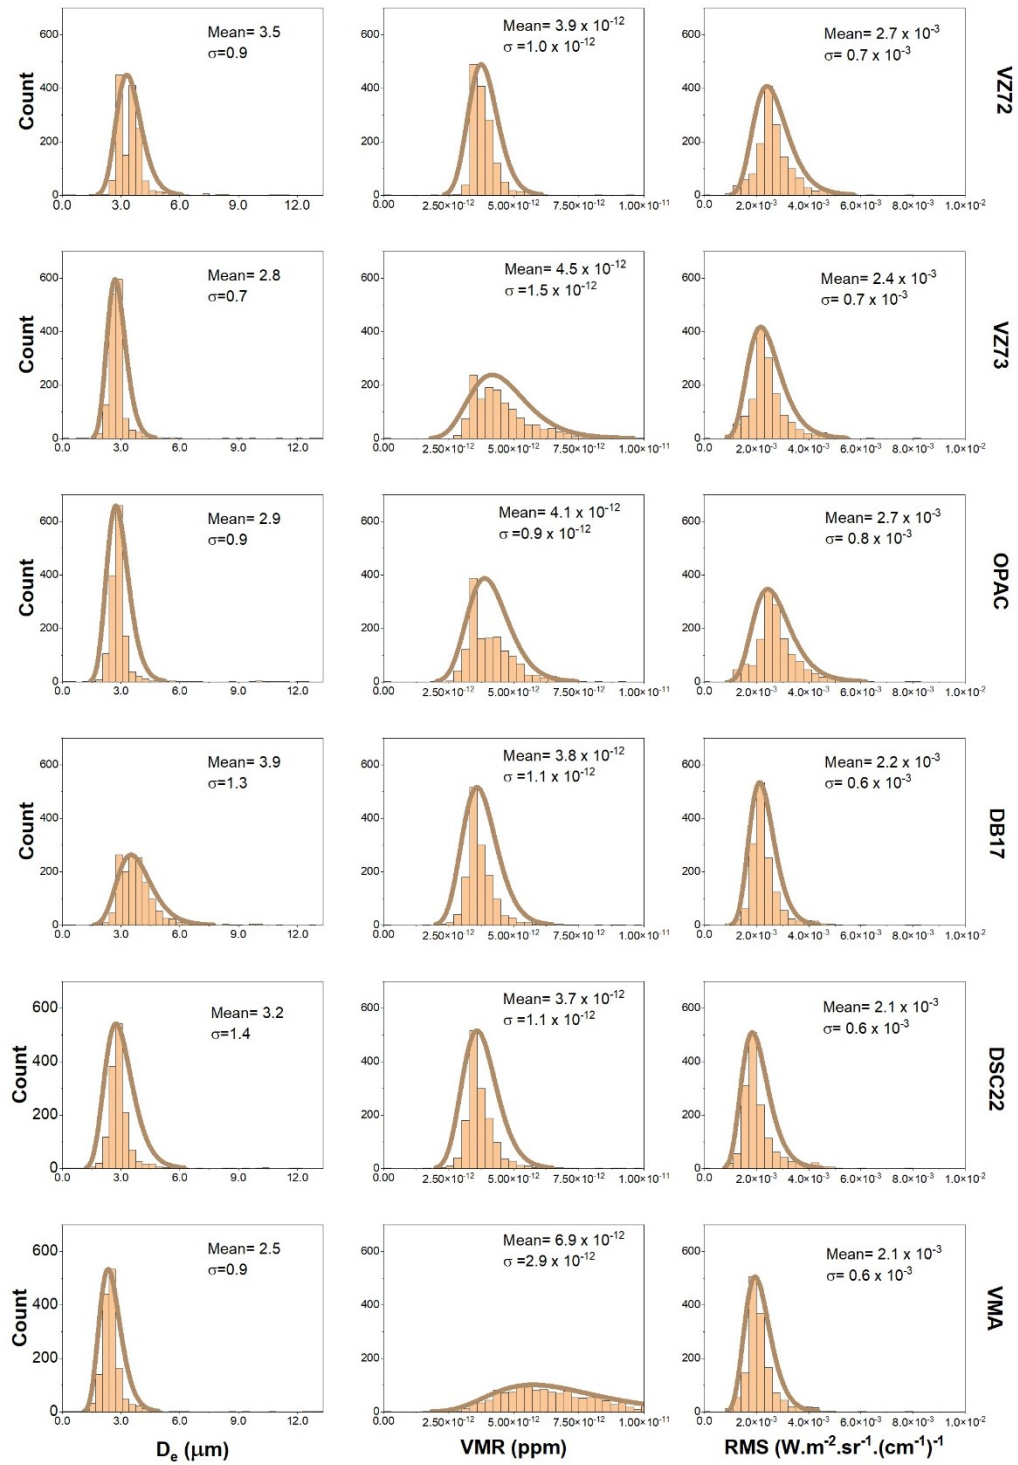

**Figure S1.** The normal distribution of the aerosol parameters retrieval of the dust plume originating from the Gobi Desert in 4 May 2017 applied on six literature CRIs using ARAHMIS: VZ72: Volz, 1972; VZ73: Volz, 1973; OPAC: Hess et al., 1998; DB17: Di Biagio et al., 2017; DSC22: Deschutter, 2022; VMA: Volume mixing approximation from Deschutter, 2022.
